# Supplementary material
Source: PubMed Central journal article supplement (PMC6990972)
Supplement: jamaneurol-77-419-s001.pdf [file jamaneurol-77-419-s001.pdf]

## Supplementary Online Content

Hunter LE, Freudenberg-Hua Y, Davies P, et al. Associations of apolipoprotein E  $\epsilon$ 4 genotype and ball heading with verbal memory in amateur soccer players.

*JAMA Neurol.* Published online January 27, 2020.

doi:10.1001/jamaneurol.2019.4828

**eTable 1.** Estimated Mean Change in Verbal Memory Stratified by Sex

**eTable 2.** Estimated Mean Change in Verbal Memory in Only White Players

**eTable 3.** Difference in Verbal Memory Score in APOE- $\epsilon$ 4 (-) vs APOE- $\epsilon$ 4 (+) by Racial Category

This supplementary material has been provided by the authors to give readers additional information about their work.

| <b>eTable 1.</b> Estimated Mean Change in Verbal Memory Stratified by Sex               |                               |                             |
|-----------------------------------------------------------------------------------------|-------------------------------|-----------------------------|
|                                                                                         | <b>Men<sup>a</sup></b>        | <b>Women<sup>b</sup></b>    |
| International Shopping List Delayed Recall ( <i>higher score = better performance</i> ) |                               |                             |
| <b>Model 1</b>                                                                          | <b>β (95% CI)<br/>P</b>       | <b>β (95% CI)<br/>P</b>     |
| Heading Exposure                                                                        |                               |                             |
| Low (Reference)                                                                         | ---                           | ---                         |
| Medium                                                                                  | ---                           | ---                         |
| High                                                                                    | -0.33 (-0.69, 0.03)<br>0.07   | -0.04 (-0.37, 0.30)<br>0.84 |
|                                                                                         | -0.70 (-1.12, -0.28)<br><0.01 | -0.34 (-0.79, 0.10)<br>0.13 |
|                                                                                         | 0.13 (-0.31, 0.56)<br>0.57    | -0.02 (-0.44, 0.41)<br>0.94 |
| ApoE4                                                                                   |                               | -0.02 (-0.44, 0.41)<br>0.94 |
| <b>Model 2</b>                                                                          |                               |                             |
| Heading Exposure                                                                        |                               |                             |
| Low                                                                                     | 0.33 ( -0.03, 0.69)<br>0.07   | 0.04 (-0.30, 0.37)<br>0.84  |
| Medium (Reference)                                                                      | ---                           | ---                         |
| High                                                                                    | ---                           | ---                         |
|                                                                                         | -0.37 ( -0.78, 0.04)<br>0.08  | -0.31 (-0.79, 0.18)<br>0.21 |
| ApoE4                                                                                   | 0.13 (-0.31, 0.56)<br>0.57    | -0.02 (-0.44, 0.41)<br>0.94 |

Beta values refer to the difference in ISRL score as compared to the reference group.

<sup>a</sup> Adjusted for age, years of education, race, smoking history and alcohol use.

<sup>b</sup> Adjusted for, age, years of education and race and alcohol use.

| eTable 2. Estimated Mean Change in Verbal Memory in Only White Players (N =235<br>Observations = 765)                                                                                                                                                                                                                                                                                                                                                                                |                                |                                                                                                            |                                |
|--------------------------------------------------------------------------------------------------------------------------------------------------------------------------------------------------------------------------------------------------------------------------------------------------------------------------------------------------------------------------------------------------------------------------------------------------------------------------------------|--------------------------------|------------------------------------------------------------------------------------------------------------|--------------------------------|
|                                                                                                                                                                                                                                                                                                                                                                                                                                                                                      | Main Effects Model*            | ApoE4 Stratified analyses <sup>+</sup><br>ApoE4 (-) players <sup>a</sup> ApoE4 (+)<br>players <sup>b</sup> |                                |
| International Shopping List Delayed Recall ( <i>higher score = better performance</i> )                                                                                                                                                                                                                                                                                                                                                                                              |                                |                                                                                                            |                                |
| Model 1                                                                                                                                                                                                                                                                                                                                                                                                                                                                              | β (95% CI)<br>P                | β (95% CI)<br>P                                                                                            | β (95% CI)<br>P                |
| Heading Exposure                                                                                                                                                                                                                                                                                                                                                                                                                                                                     |                                |                                                                                                            |                                |
| Low (Reference)                                                                                                                                                                                                                                                                                                                                                                                                                                                                      | ---                            | ---                                                                                                        | ---                            |
| Medium                                                                                                                                                                                                                                                                                                                                                                                                                                                                               | ---                            | ---                                                                                                        | ---                            |
| High                                                                                                                                                                                                                                                                                                                                                                                                                                                                                 | -0.36 (-0.67, -0.05)<br>0.02   | -0.35 (-0.71, 0.02)<br>0.06                                                                                | -0.27 (-0.80, 0.26)<br>0.31    |
|                                                                                                                                                                                                                                                                                                                                                                                                                                                                                      | -0.74 (-1.14, -0.34)<br><0.001 | -0.51 (-0.96, -0.06)<br>0.03                                                                               | -1.35 (-2.08, -0.62)<br><0.001 |
| ApoE4                                                                                                                                                                                                                                                                                                                                                                                                                                                                                | 0.16 (-0.23, 0.55)<br>0.43     | N/A                                                                                                        | N/A                            |
| Model 2                                                                                                                                                                                                                                                                                                                                                                                                                                                                              |                                |                                                                                                            |                                |
| Heading Exposure                                                                                                                                                                                                                                                                                                                                                                                                                                                                     |                                |                                                                                                            |                                |
| Low                                                                                                                                                                                                                                                                                                                                                                                                                                                                                  | 0.36 (0.05, 0.67)<br>0.02      | 0.35 (-0.02, 0.71)<br>0.06                                                                                 | 0.27 (-0.26, 0.80)<br>0.31     |
| Medium                                                                                                                                                                                                                                                                                                                                                                                                                                                                               | ---                            | ---                                                                                                        | ---                            |
| (Reference)                                                                                                                                                                                                                                                                                                                                                                                                                                                                          | ---                            | ---                                                                                                        | ---                            |
| High                                                                                                                                                                                                                                                                                                                                                                                                                                                                                 | -0.38 (-0.81, 0.05)<br>0.08    | -0.16 (-0.65, 0.32)<br>0.51                                                                                | -1.08 (-1.83, -0.34)<br><0.01  |
| ApoE4                                                                                                                                                                                                                                                                                                                                                                                                                                                                                | 0.16 (-0.23, 0.55)<br>0.43     | N/A                                                                                                        | N/A                            |
| Beta values refer to the difference in ISRL score as compared to the reference group.<br><sup>+</sup> P-value for ApoE4 x Heading interaction from GEE model: p = 0.08<br><sup>*</sup> Adjusted for gender, age, years of education, race, smoking history and alcohol use.<br><sup>a</sup> Adjusted for gender, age, years of education, race, smoking history and alcohol use.<br><sup>b</sup> Adjusted for gender, age, years of education race, smoking history and alcohol use. |                                |                                                                                                            |                                |

| <b>eTable 3.</b> Difference in Verbal Memory Score in APOE-ε4 (-) vs APOE-ε4 (+) by Racial Category                                                 |                            |                            |          |
|-----------------------------------------------------------------------------------------------------------------------------------------------------|----------------------------|----------------------------|----------|
|                                                                                                                                                     | <b>APOE-ε4 (-) Players</b> | <b>APOE-ε4 (+) Players</b> | <b>P</b> |
| <b>Racial category</b>                                                                                                                              | <b>Mean (95 % CI)</b>      | <b>Mean (95 % CI)</b>      |          |
| Caucasian                                                                                                                                           | 10.19 (10.00 -10.40)       | 10.32 (9.96- 10.67)        | 0.60     |
| African American                                                                                                                                    | 8.60 (8.17- 9.02)          | 8.55 (7.79- 9.31)          | 0.91     |
| Asian                                                                                                                                               | 9.95 (9.25 – 10.66)        | 8.96 (7.48- 10.44)         | 0.27     |
| Native Hawaiian or<br>pacific islander <sup>1</sup>                                                                                                 | --                         | --                         | ---      |
| Unknown                                                                                                                                             | 9.34 (8.69- 9.98)          | 9.19 (7.77-10.60)          | 0.87     |
| Models adjusted for gender, age, years of education, and alcohol use.<br><sup>1</sup> Insufficient number of data points for testable coefficients. |                            |                            |          |
